# Supplementary material for: Identification of a βCD-Based Hyper-Branched Negatively Charged Polymer as HSV-2 and RSV Inhibitor
Source: MDPI journal article supplement (doi:10.3390/ijms23158701), 2022-08-04
Supplement: s1 [file s1]

# Identification of a $\beta$ CD-Based Hyper-Branched Negatively Charged Polymer as HSV-2 and RSV Inhibitor

Rachele Francese <sup>1#</sup>, Claudio Ceccone <sup>2#</sup>, Matteo Costantino <sup>1</sup>, Gjylje Hoti <sup>2</sup>, Pierangiola Bracco <sup>2</sup>,  
David Lembo <sup>1\*</sup>, Francesco Trotta <sup>2\*</sup>

<sup>1</sup> *Laboratory of Molecular Virology and Antiviral Research, Department of Clinical and Biological Sciences, University of Turin, Italy*

<sup>2</sup> *Department of Chemistry, Nis Interdepartmental Centre, University of Turin, Via P. Giuria 7, Turin, 10125, Italy*

#RF and CC: these authors equally contributed to the work

\*Corresponding authors

**Supplementary Material**

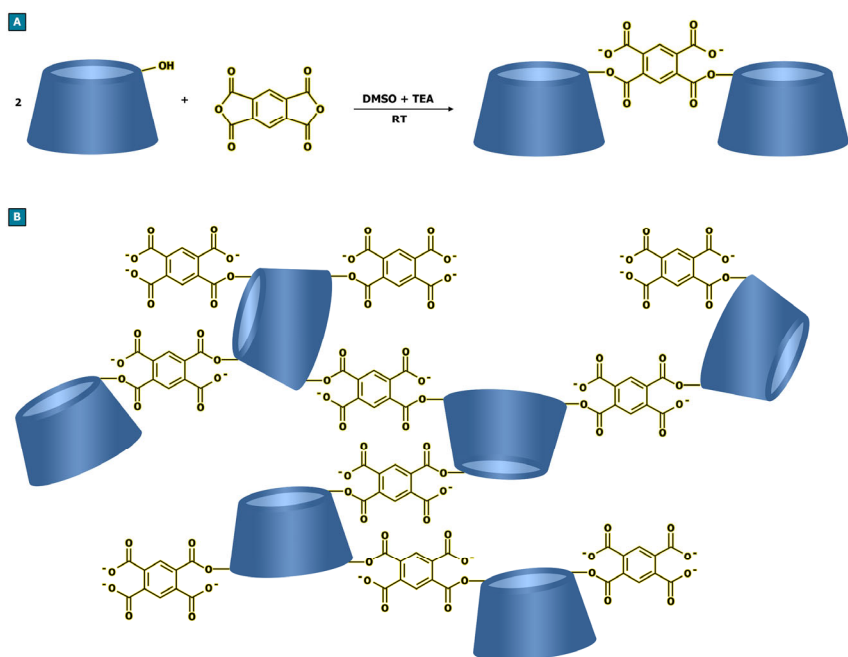

**Figure S1.** (A) Reaction occurring between  $\beta$ CD and PMDA, (B) P<sub>PMDA</sub> proposed structure.

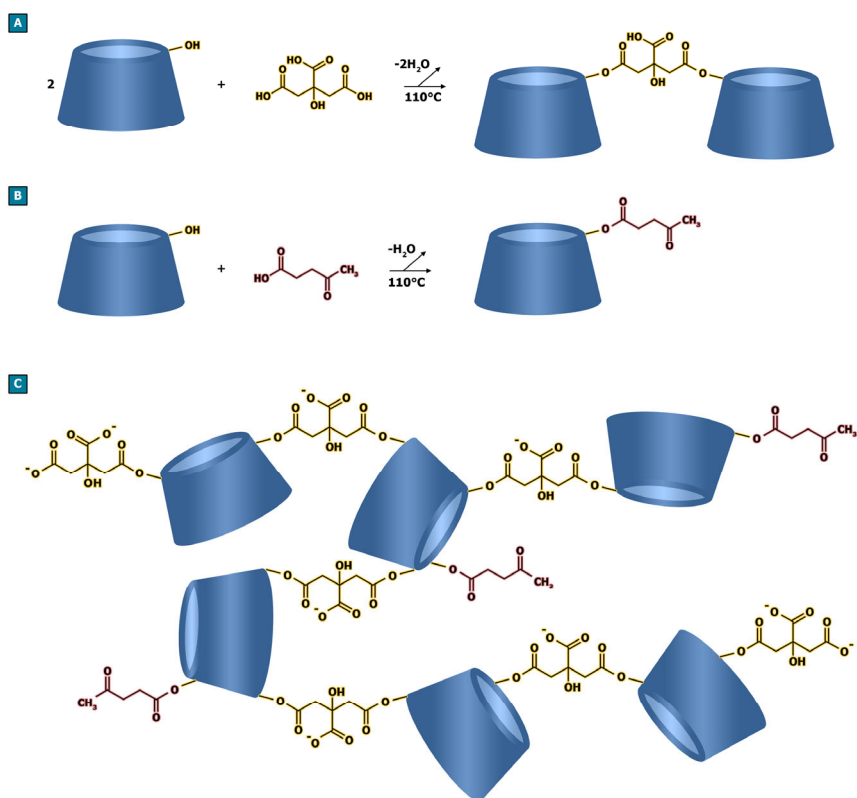

**Figure S2.** (A) Reaction occurring between  $\beta$ CD and CA, (B) Reaction occurring between  $\beta$ CD and LA, (C) P<sub>CA\_LA</sub> proposed structure.

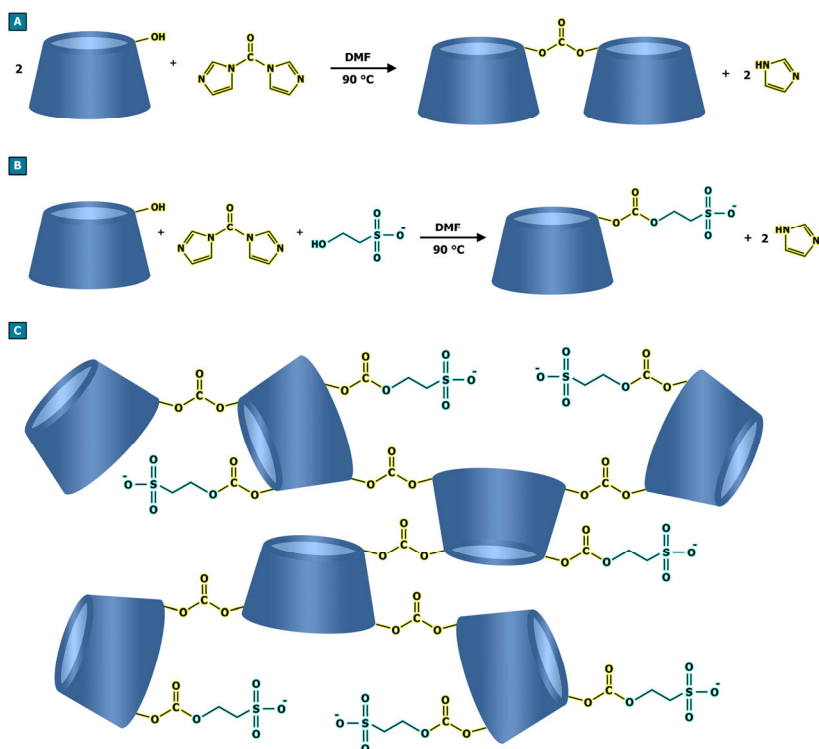

**Figure S3.** (A) Reaction occurring between  $\beta$ CD and CDI, (B) Reaction occurring between  $\beta$ CD, CDI, and ISE, (C) P\_CDI\_ISE proposed structure.

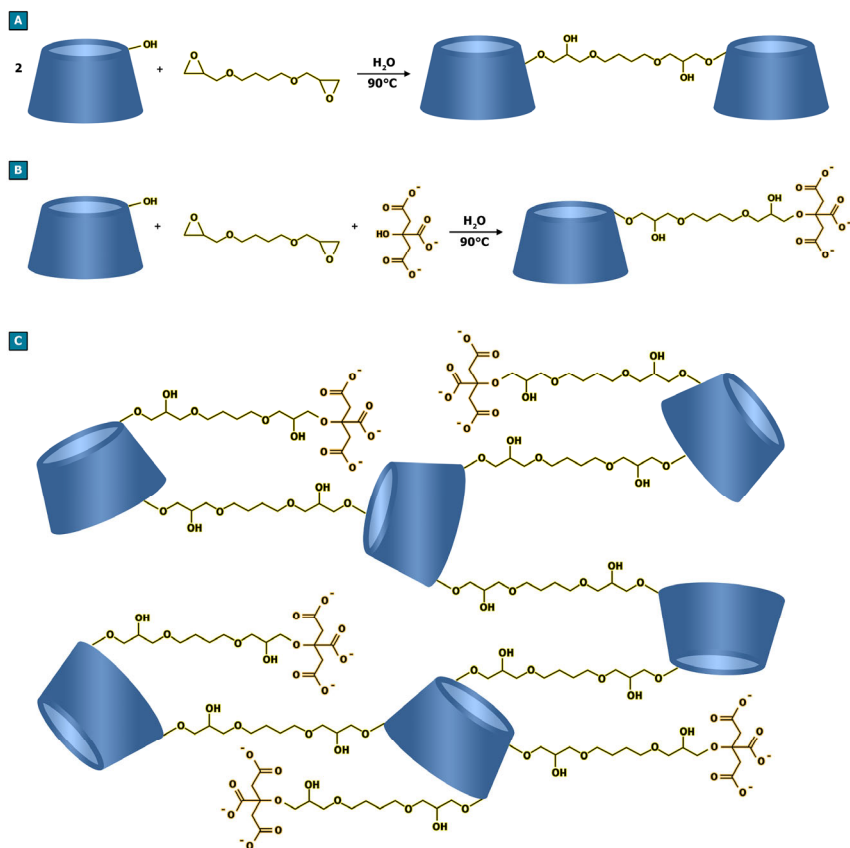

**Figure S4.** (A) Reaction occurring between  $\beta$ CD and BDE, (B) Reaction occurring between  $\beta$ CD, BDE, and CIT, (C) P\_BDE\_CIT proposed structure.

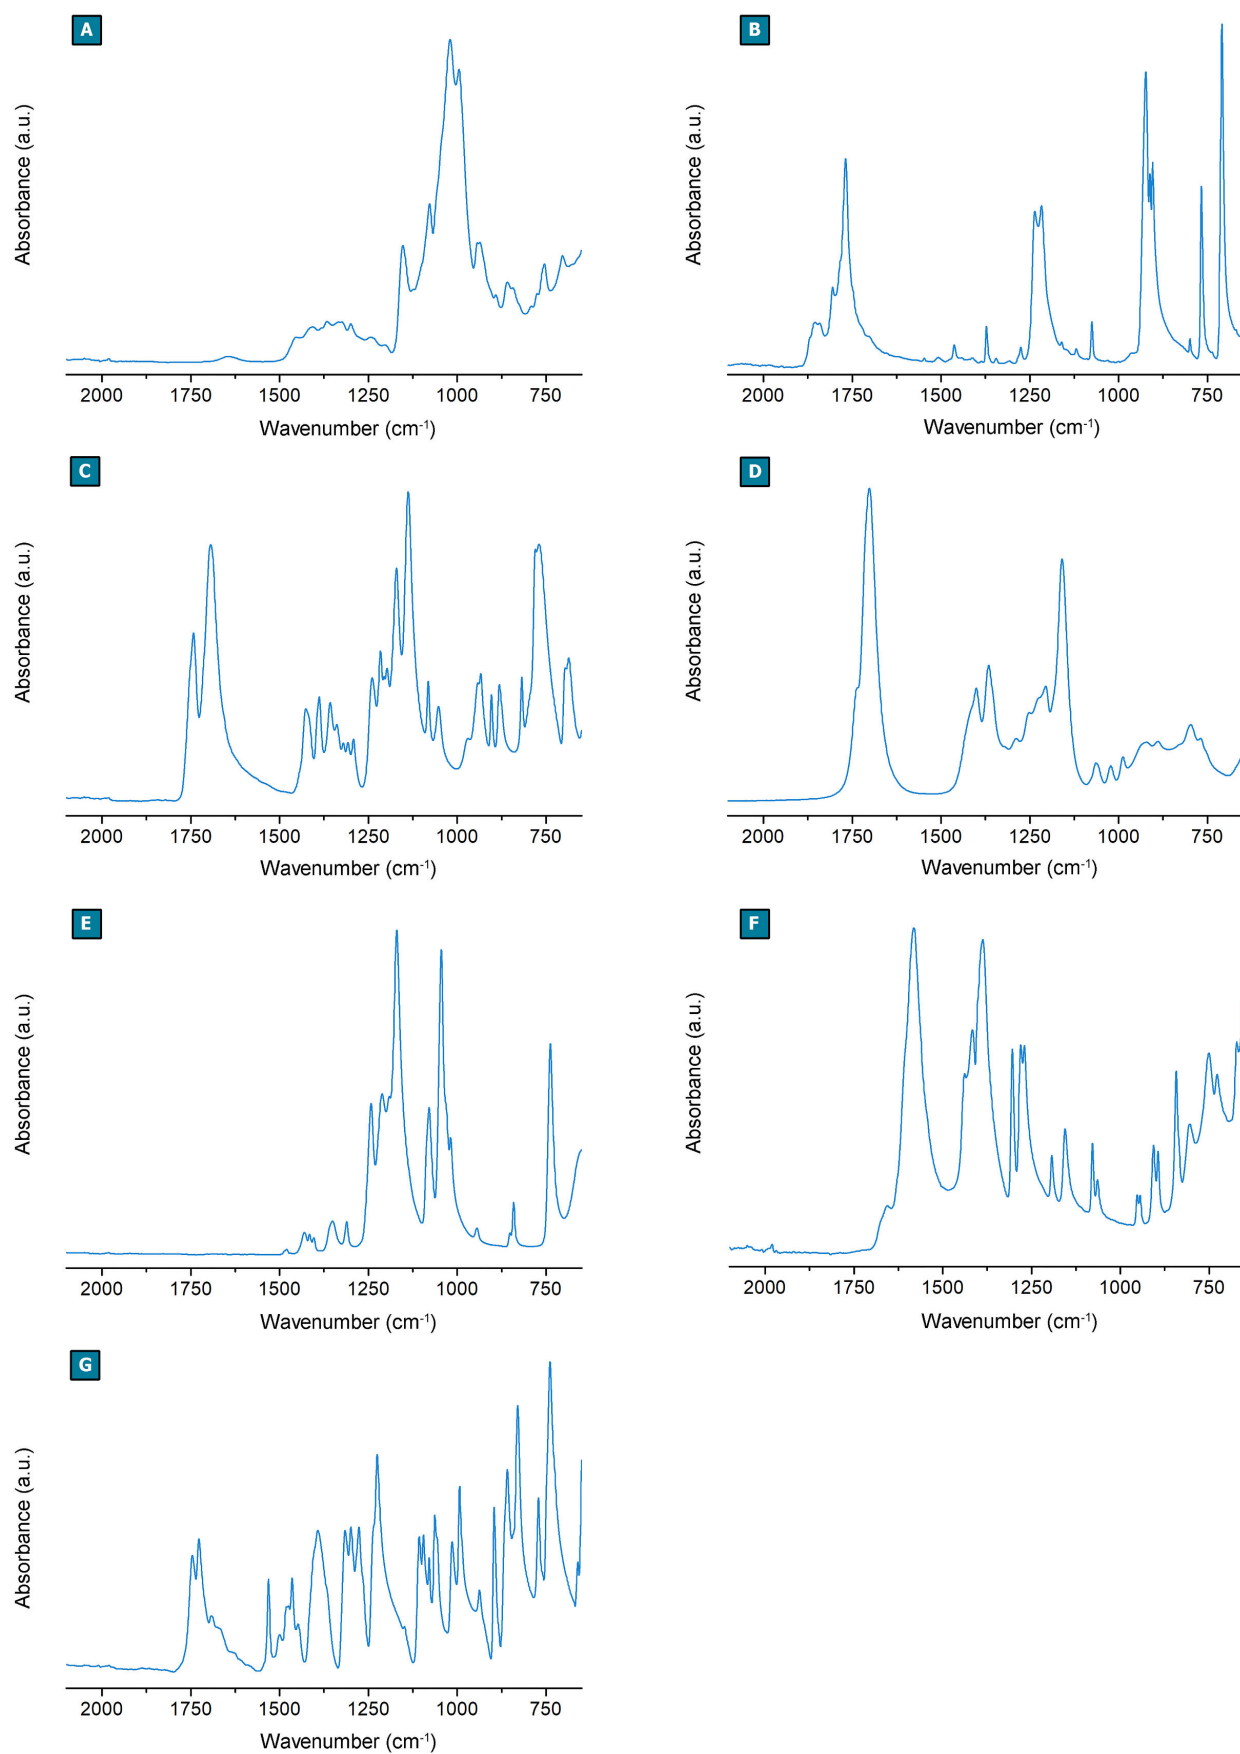

**Figure S5.** FTIR-ATR spectra of (A)  $\beta$ CD, (B) PMDA, (C) CA, (D) LA, (E) ISE, (F) CIT, (G) CDI.

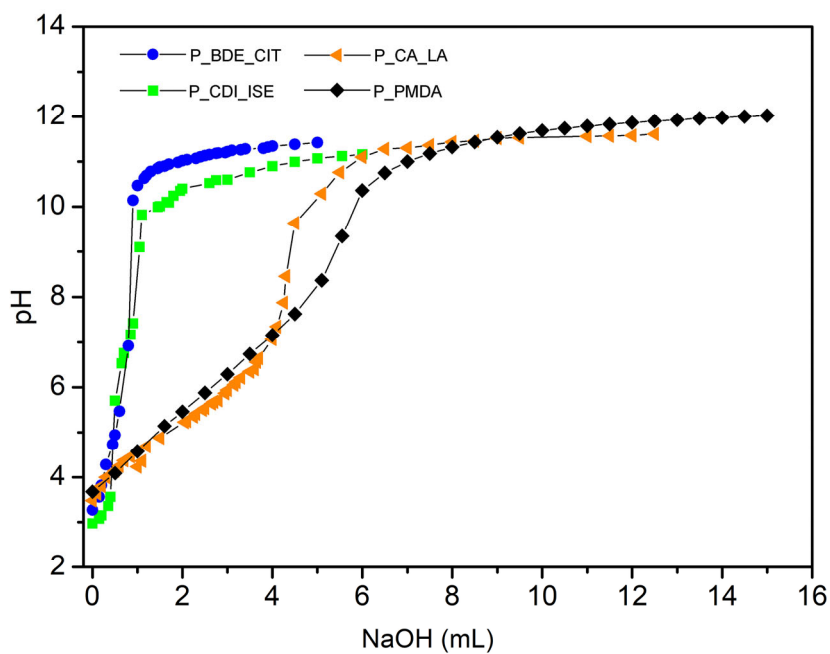

**Figure S6.** Potentiometric titration curves.

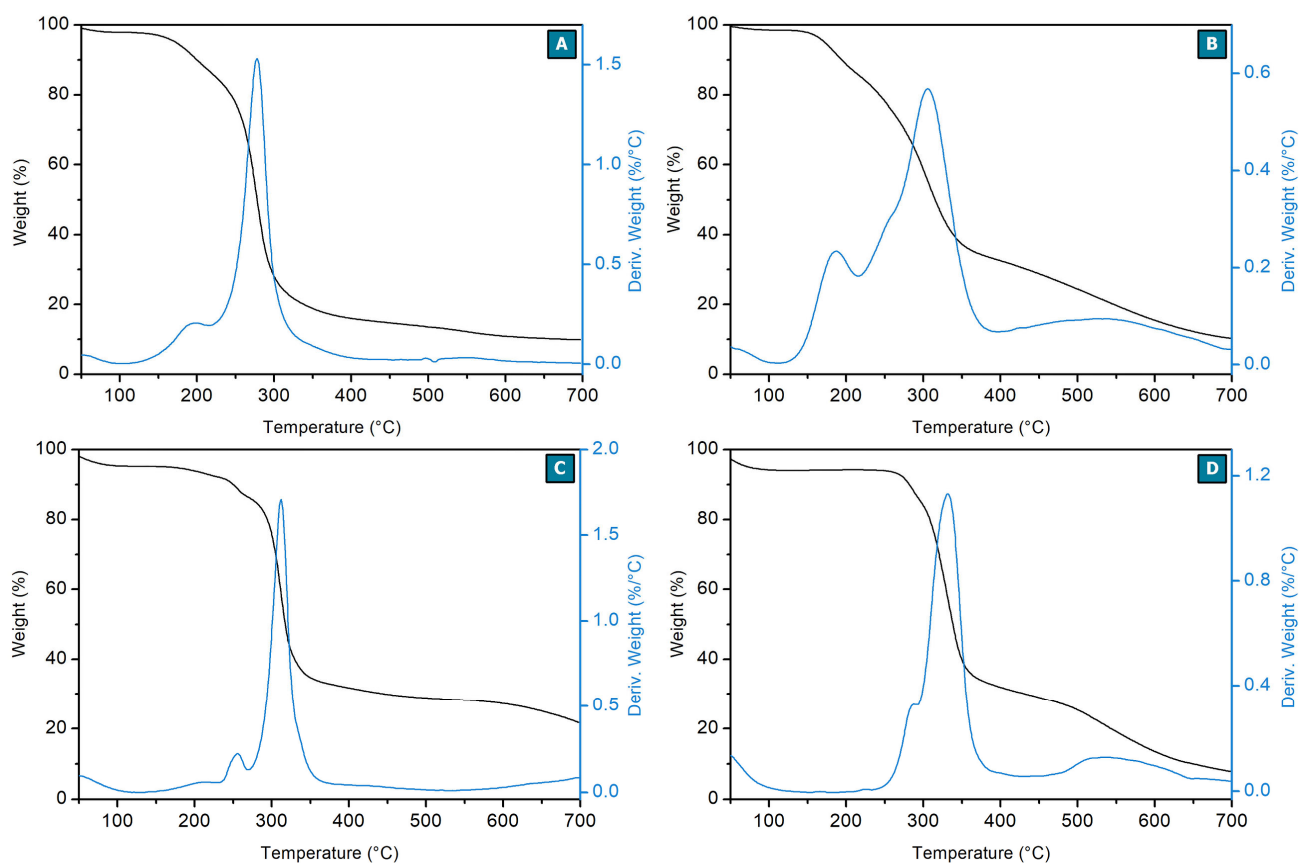

**Figure S7.** TGA and DTGA of (A) P\_PMDA, (B) P\_CA\_LA (C) P\_CDI\_ISE, and (D) P\_BDE\_CIT.

**Table S1.** Raw data of P\_PMDA and P\_PMDA<sub>50</sub> virucidal activities

|              | <b>Sample</b>                    | <b>Titer<br/>(PFU/mL)</b> | <b>*R</b> |
|--------------|----------------------------------|---------------------------|-----------|
| <b>RSV</b>   | Untreated                        | 257178                    |           |
|              | P_PMDA (500 µg/mL)               | 18471                     | 1.1       |
|              | P_PMDA (300 µg/mL)               | 43170                     | 0.8       |
|              | P_PMDA (100 µg/mL)               | 107325                    | 0.4       |
|              | P_PMDA <sub>50</sub> (500 µg/mL) | 30101                     | 0.9       |
|              | P_PMDA <sub>50</sub> (300 µg/mL) | 43486                     | 0.8       |
|              | P_PMDA <sub>50</sub> (100 µg/mL) | 200138                    | 0.1       |
| <b>HSV-2</b> | Untreated                        | 897075                    |           |
|              | P_PMDA (1.5 µg/mL)               | 599075                    | 0.2       |
|              | P_PMDA (15 µg/mL)                | 315150                    | 0.5       |
|              | P_PMDA (100 µg/mL)               | 330480                    | 0.4       |
|              | P_PMDA <sub>50</sub> (1.5 µg/mL) | 493514                    | 0.3       |
|              | P_PMDA <sub>50</sub> (15 µg/mL)  | 203016                    | 0.6       |

\*Logarithm of inactivation R = Log (Untreated sample) – Log (Treated sample)

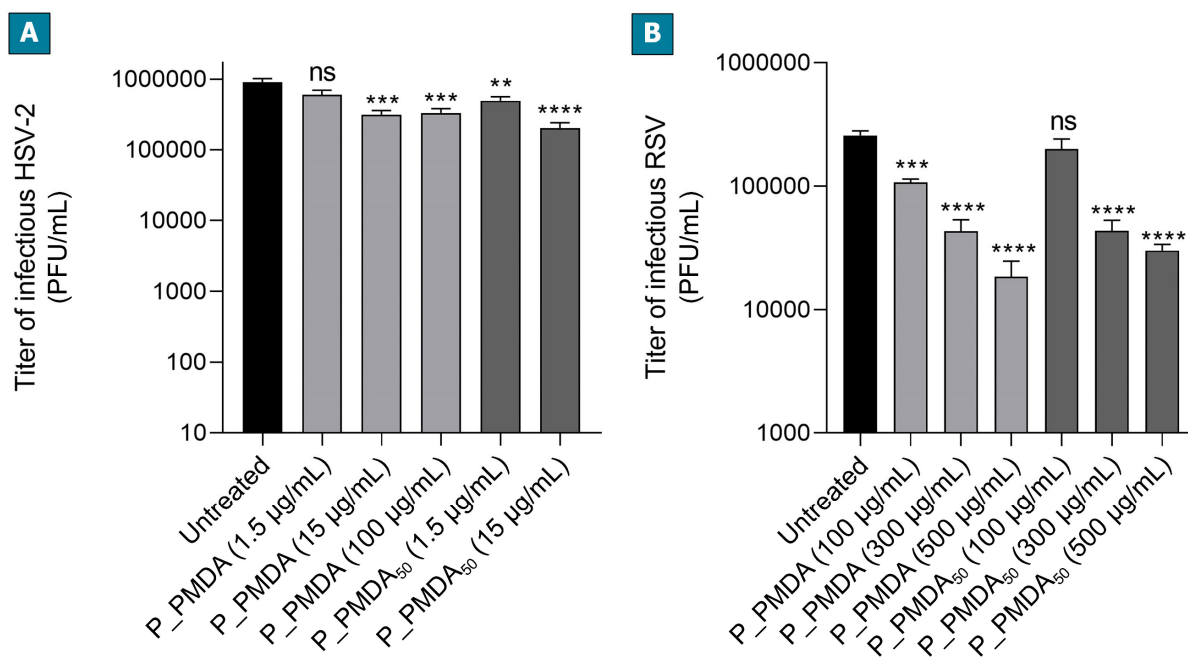

**Figure S8. HSV-2 and RSV inactivation assays with additional concentrations of compounds.** HSV-2 (A) and RSV (B) inactivation assays. HSV-2 or RSV infectious particles were additionally incubated with 100 µg/mL of P\_PMDA or P\_PMDA<sub>50</sub> for 2 hours at 37°C and the residual viral infectivity was then evaluated by titration to the non-inhibitory concentration of the polymers. Graphs including all tested doses are reported. On the y-axis, the infectious titers are expressed as plaque-forming units per mL (PFU/mL). Error bars represent standard error of the mean (SEM) of three independent experiments (ANOVA and Bonferroni Post hoc test; ns  $p > 0.05$ , \*\* $p < 0.005$ , \*\*\* $p < 0.0005$ , \*\*\*\* $p < 0.0001$ )

**Table S2.** Raw data of P\_PMDA and P\_PMDA<sub>50</sub> binding inhibition activities

|              | <b>Sample</b>                    | <b>Titer<br/>(PFU/mL)</b> | <b>*R</b> |
|--------------|----------------------------------|---------------------------|-----------|
| <b>RSV</b>   | Untreated                        | 7119                      |           |
|              | P_PMDA (500 µg/mL)               | 2655                      | 0.4       |
|              | P_PMDA (300 µg/mL)               | 1508                      | 0.7       |
|              | P_PMDA <sub>50</sub> (500 µg/mL) | 1917                      | 0.6       |
|              | P_PMDA <sub>50</sub> (300 µg/mL) | 1755                      | 0.6       |
| <b>HSV-2</b> | Untreated                        | 251809                    |           |
|              | P_PMDA (1.5 µg/mL)               | 7721                      | 1.5       |
|              | P_PMDA (15 µg/mL)                | 2817                      | 2.0       |
|              | P_PMDA (100 µg/mL)               | 5428                      | 1.7       |
|              | P_PMDA <sub>50</sub> (1.5 µg/mL) | 68876                     | 0.6       |
|              | P_PMDA <sub>50</sub> (15 µg/mL)  | 13355                     | 1.3       |
|              | P_PMDA <sub>50</sub> (100 µg/mL) | 25158                     | 1.0       |
|              | P_PMDA <sub>50</sub> (300 µg/mL) | 5802                      | 1.8       |
|              | P_PMDA <sub>50</sub> (500 µg/mL) | 6056                      | 1.8       |

\*Logarithm of inhibition R = Log (Untreated sample) – Log (Treated sample)



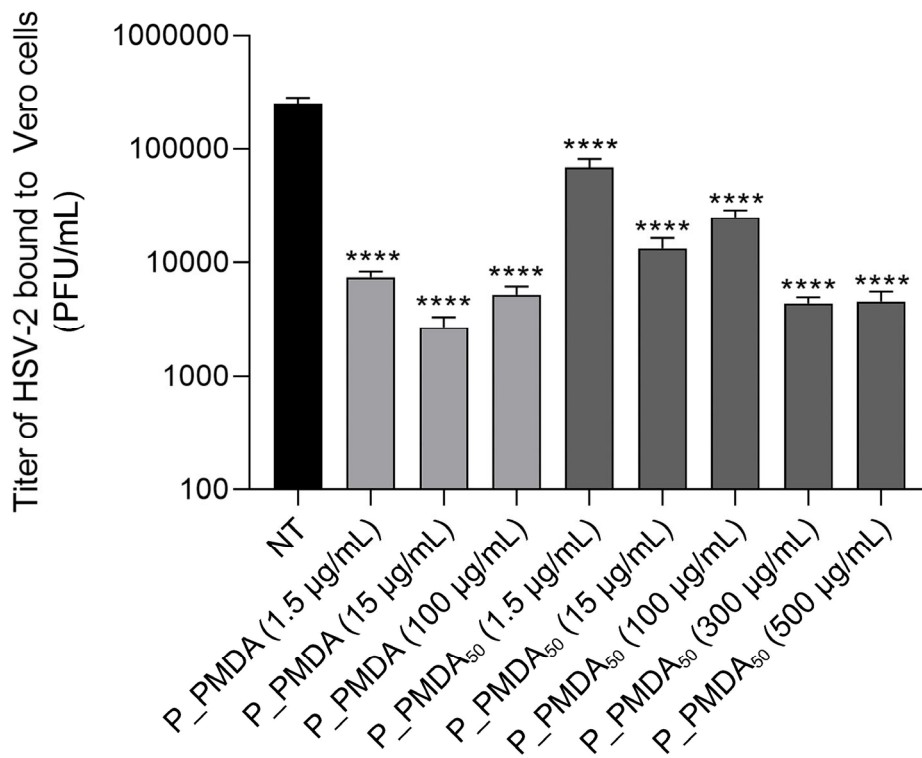

**Figure S9. HSV-2 and RSV binding assays with additional concentrations of compounds.** HSV-2 (MOIs = 3) was allowed to attach to cells in presence of additional 100 µg/mL of P\_PMDA, or 100, 300 and 500 µg/mL of P\_PMDA. The cell-bound virus titers were determined by means of titration on confluent cells. A graph including all tested doses is reported. On the y-axis, the infectious titers are expressed as plaque-forming units per mL (PFU/mL). Error bars represent standard error of the mean (SEM) of three independent experiments (ANOVA and Bonferroni Post hoc test; \*\*\*\*p<0.0001).
